# Supplementary material
Source: Springer Nature journal article supplement (https://www.springermedizin.de/resource/supplementary/12958_2009_568_MOESM1_ESM.pdf/9568326)

# Human Chromosome 10q11.2

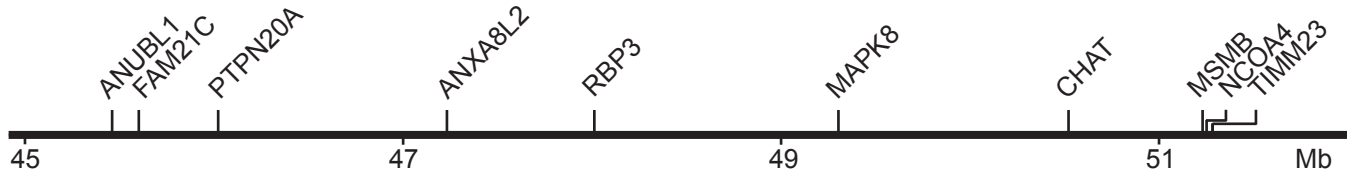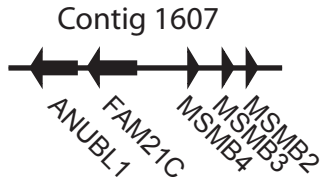

Common marmoset MSMB loci

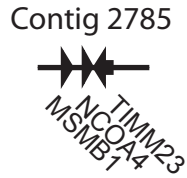

Supplement: MOESM1 [file 9568326]
